# Supplementary material for: Predictors of persistent moderate and severe food insecurity in a longitudinal survey in Mexico during the COVID-19 pandemic
Source: Frontiers journal article supplement (doi:10.3389/fpubh.2024.1374815), 2024-06-26
Supplement: Table_1.pdf [file Table_1.pdf]

**Supplementary Table 1. Attrition analysis comparing key variables between the analytic sample and participants lost in follow-up.**

| <b>Predictor</b>      | <b>Categories</b>                 | <b>Panel participants in<br/>2020, 2021 &amp; 2022<br/>(n = 1,067<sup>1</sup>)</b> | <b>Participants who didn't<br/>respond the follow up in<br/>2021 or 2022 (n = 3,613)</b> | <b><i>p-value</i><br/>(95%)</b> |
|-----------------------|-----------------------------------|------------------------------------------------------------------------------------|------------------------------------------------------------------------------------------|---------------------------------|
| HFI                   | Food secure                       | 36.78 %                                                                            | 30.11 %                                                                                  | p = 0.000                       |
|                       | Mild insecure                     | 41.70 %                                                                            | 41.26 %                                                                                  | p = 0.825                       |
|                       | Moderate insecure                 | 13.96 %                                                                            | 17.54 %                                                                                  | p = 0.006                       |
|                       | Severe insecure                   | 7.59 %                                                                             | 11.07 %                                                                                  | p = 0.001                       |
| Age of<br>interviewee | Age                               | 43.61                                                                              | 40.17                                                                                    | p = 0.000                       |
| Sex of<br>interviewee | Woman                             | 53.13 %                                                                            | 57.04 %                                                                                  | p = 0.026                       |
|                       | Man                               | 46.86 %                                                                            | 42.95 %                                                                                  | p = 0.026                       |
| Education             | 1 year                            | 2.43 %                                                                             | 4.04 %                                                                                   | p = 0.018                       |
|                       | 3 years                           | 17.90 %                                                                            | 21.20 %                                                                                  | p = 0.021                       |
|                       | 4 years                           | 21.55 %                                                                            | 28.84 %                                                                                  | p = 0.000                       |
|                       | 5 years                           | 20.52 %                                                                            | 21.89 %                                                                                  | p = 0.361                       |
|                       | 6 years                           | 37.58 %                                                                            | 24.02 %                                                                                  | P = 0.000                       |
| Size                  | Number of<br>household<br>members | 4.11                                                                               | 4.35                                                                                     | p = 0.000                       |
| SES                   | 1                                 | 2.90 %                                                                             | 7.11 %                                                                                   | p = 0.000                       |
|                       | 2                                 | 19.40 %                                                                            | 29.80 %                                                                                  | p = 0.000                       |
|                       | 3                                 | 14.33 %                                                                            | 16.32 %                                                                                  | p = 0.129                       |
|                       | 4                                 | 12.65 %                                                                            | 14.55 %                                                                                  | p = 0.128                       |
|                       | 5                                 | 14.24 %                                                                            | 13.31 %                                                                                  | p = 0.464                       |
|                       | 6                                 | 18.55 %                                                                            | 12.31 %                                                                                  | p = 0.000                       |
|                       | 7                                 | 17.90 %                                                                            | 6.55 %                                                                                   | p = 0.000                       |

<sup>1</sup> The sample size in the attrition analysis varies slightly from the sample reported in Table 1. While the sample in Table 1 includes 1,074 participants, the present table reports 1,067 individuals. This is because missing value patterns vary between the two-year models and the attrition analysis.
